# Supplementary material
Source: Springer Nature journal article supplement (https://www.springermedizin.de/resource/supplementary/12958_2012_997_MOESM4_ESM.pdf/9566582)

# Changes in *kiss* mRNAs in the brain

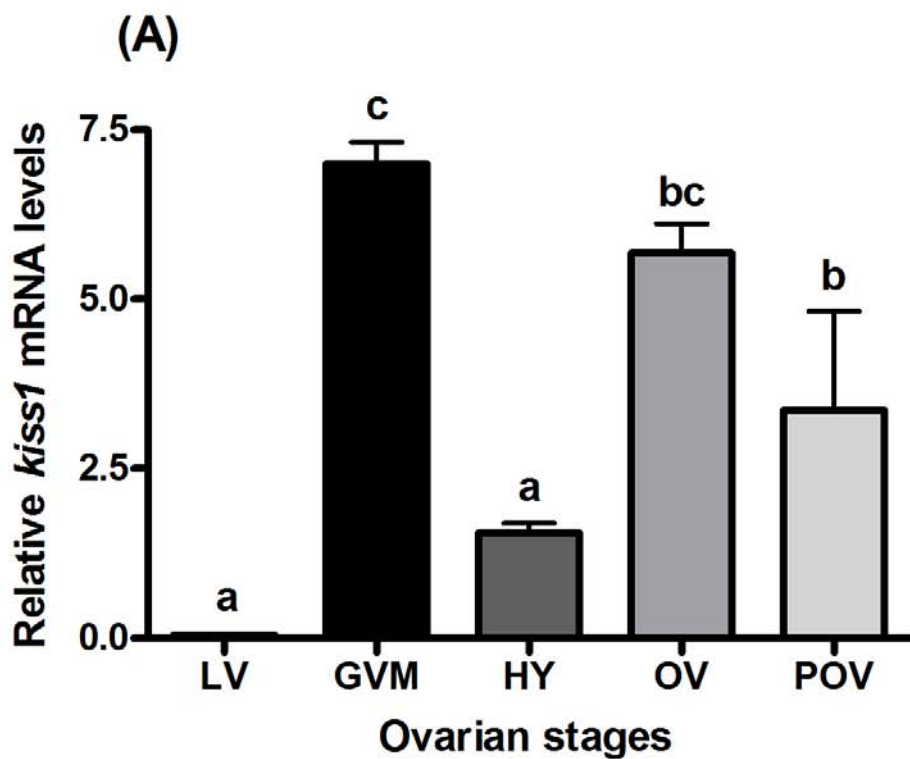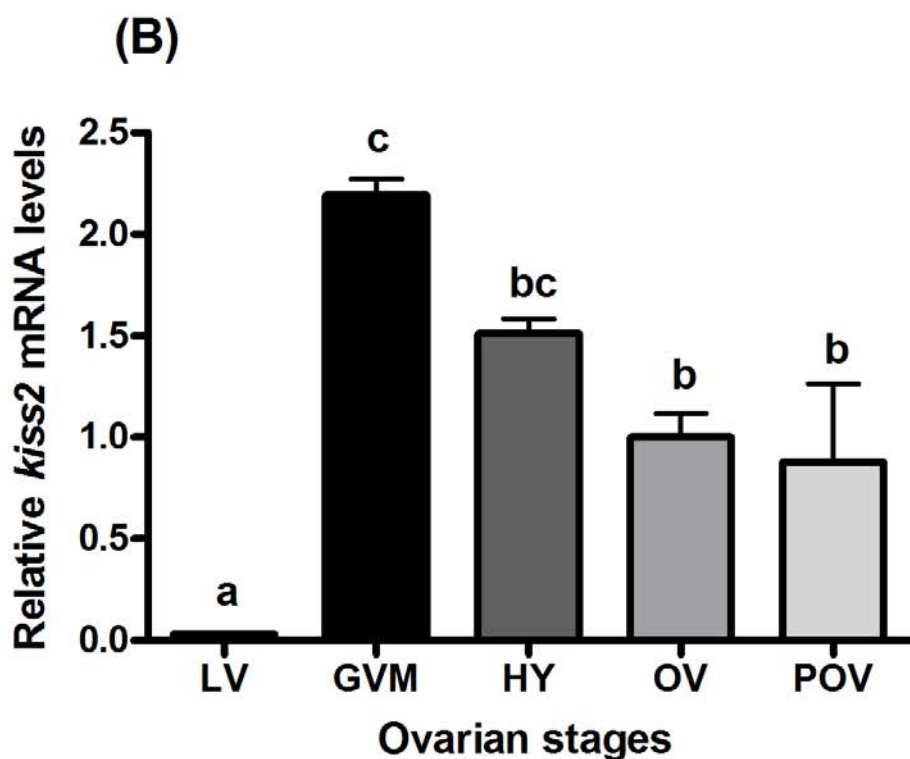

Supplement: MOESM4 [file 9566582]
